# Supplementary material for: Phenazine-1-carboxylic Acid Produced by Pseudomonas chlororaphis YL-1 Is Effective against Acidovorax citrulli
Source: MDPI journal article supplement (doi:10.3390/microorganisms9102012), 2021-09-23
Supplement: s1 [file s1]

## Supplementary Materials

### **Phenazine-1-carboxylic acid produced by *Pseudomonas chlororaphis* YL-1 is effective against *Acidovorax citrulli***

Youzhou Liu<sup>a,c</sup>, Yaqiu Zhou<sup>a</sup>, Junqing Qiao<sup>a</sup>, Wenjie Yu<sup>b</sup>, Xiayan Pan<sup>a</sup>, Tingting Zhang<sup>b</sup>, Yongfeng Liu<sup>a,\*</sup>, Shi-En Lu<sup>c\*</sup>,

<sup>a</sup> Institute of Plant Protection, Jiangsu Academy of Agricultural Sciences, Nanjing 210014

<sup>b</sup> College of Plant Protection, Nanjing Agricultural University, Nanjing 210095

<sup>c</sup> Department of Biochemistry, Molecular Biology, Entomology and Plant Pathology, Mississippi State University, Mississippi State, USA, 39759

\*Correspondence to:

Shi-En Lu, Department of Biochemistry, Molecular Biology, Entomology and Plant Pathology, Mississippi State University, Mississippi State, MS 39762; Tel: +16623253511; fax: +16623258955.

Email: [sl332@msstate.edu](mailto:sl332@msstate.edu)

Or Yongfeng Liu, Institute of Plant Protection, Jiangsu Academy of Agricultural Sciences, No.50 Zhongling Street, Nanjing 210014, China. Tel: +8602584391002.

Email: [liuyf@jaas.ac.cn](mailto:liuyf@jaas.ac.cn)

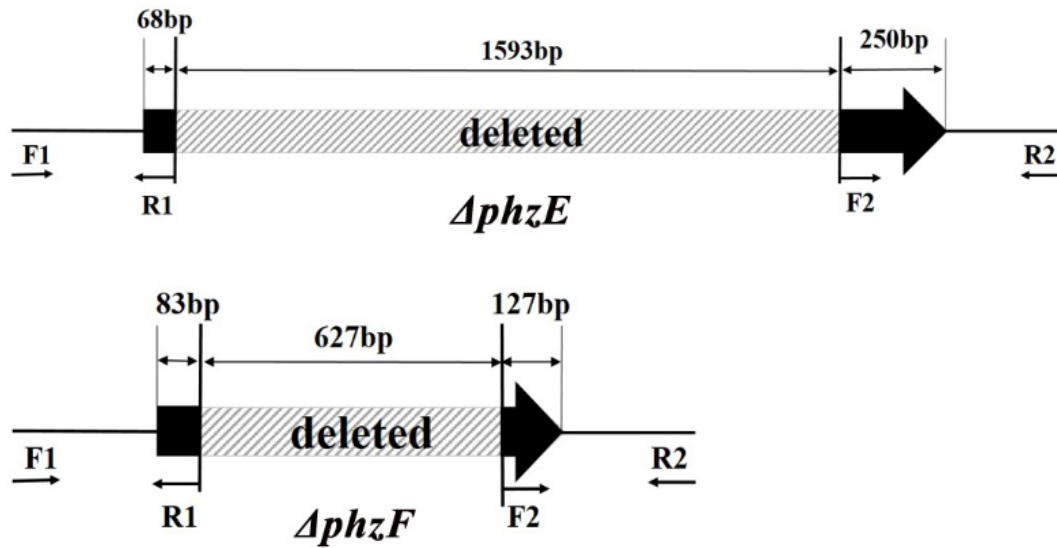

**Figure S1.** Two deletion mutants  $\Delta phzE$  and  $\Delta phzF$  of *Pseudomonas chlororaphis* YL-1. First, the upstream and downstream homolog fragments of *phzE* in wild-type strain YL-1 were cloned by using two pairs of primers (*phzE*-F1, *phzE*-R1, *phzE*-F2 and *phzE*-R2). Then, a *sacB*-containing suicide-vector, pEX18Gm was used to creating three recombinant plasmids, pEX18-*phzE*. The recombinant plasmids were first transformed into *E.coli* S17-1, then transformed into wild-type strain YL-1 via an optimized bacterial conjugal approach. Via a double-crossover homologous recombinant approach, the mutants were generated. Gene replacements were verified by PCR amplifications using specific primers and DNA sequencing. The mutant  $\Delta phzF$  was generated as described above.

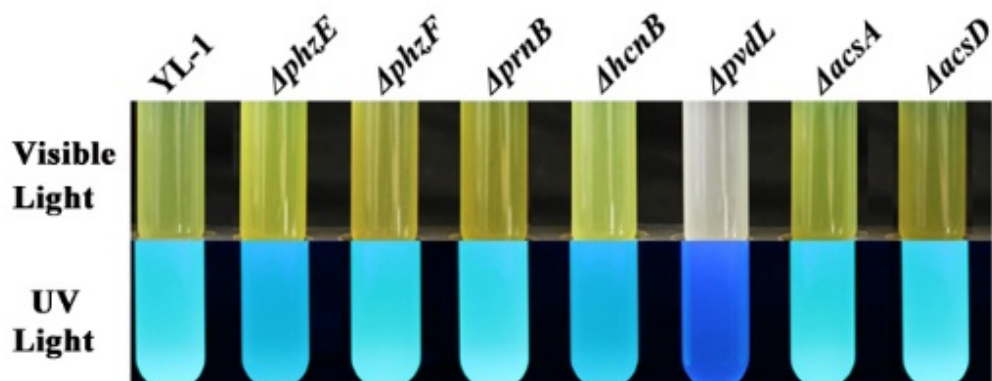

**Figure S2.** Comparison of the pyoverdine production between *P. chlororaphis* YL-1 and mutants cultured in liquid SM. *P. chlororaphis* YL-1 and mutants were cultured in liquid SM medium, respectively, at 28°C and 200 rpm for 24 h. All liquid cultures were observed under visible light and ultraviolet light.

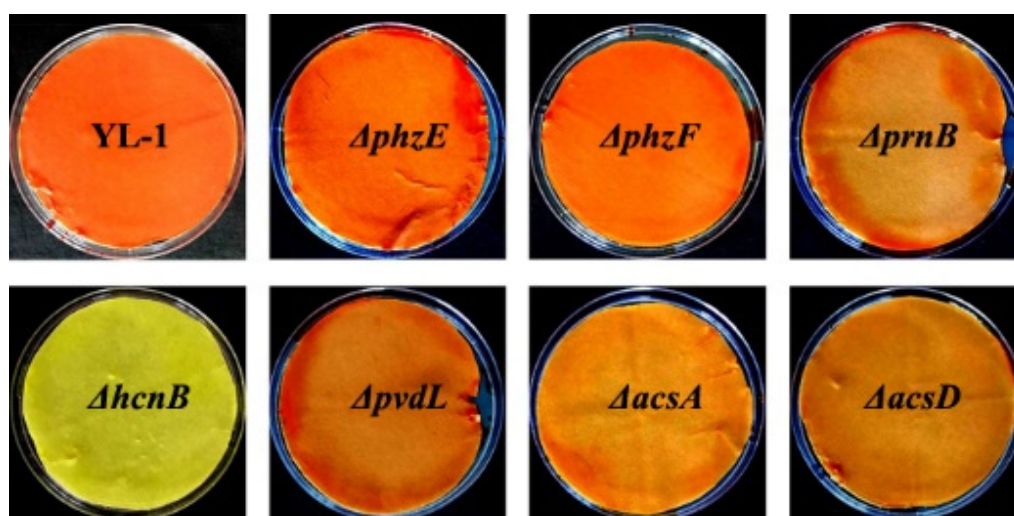

**Figure S3.** Comparison of the production of hydrogen cyanide between *P. chlororaphis* YL-1 and mutants cultured in King's B medium containing glycine (4.5 g/L). A sterilized filter paper saturated with 1% solution of picric acid and 2% sodium carbonate was placed in the upper lid of a petri dish. The petri dish was then sealed with parafilm and incubated at 30°C for 4 days. A change in color of the filter paper from yellow to reddish brown as an index of cyanogenic activity was recorded.

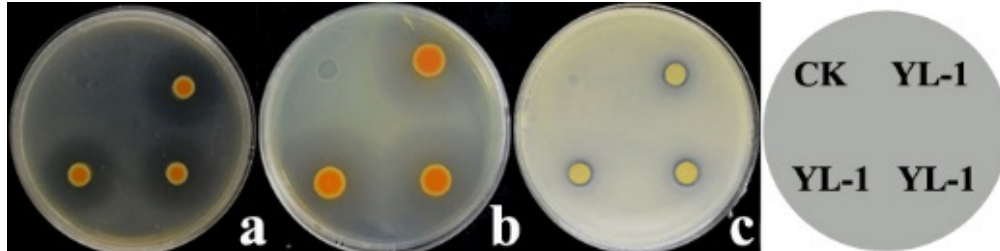

**Figure S4.** Antibacterial activity of *P. chlororaphis* YL-1 on LB plates. All strains precultured in liquid LB medium at 28°C and 200 rpm for 24 h were resuspended in distilled liquid LB medium to the desired cell density of  $10^8$  CFU/mL. After spraying the indicator bacteria onto the surface of LB plates for 1 s, 5 µL cells of strain YL-1 were added on the LB plates, 1 cm from the edge of the plate in a cross shape, and incubated at 28°C for 48 h. Distilled LB medium was used as a control. Each treatment was replicated three times, and each experiment was repeated thrice independently.

a: *A. citrulli* strain XJX12, b: *Xoo* strain PXO99, c: *Xoo* strain RS11.

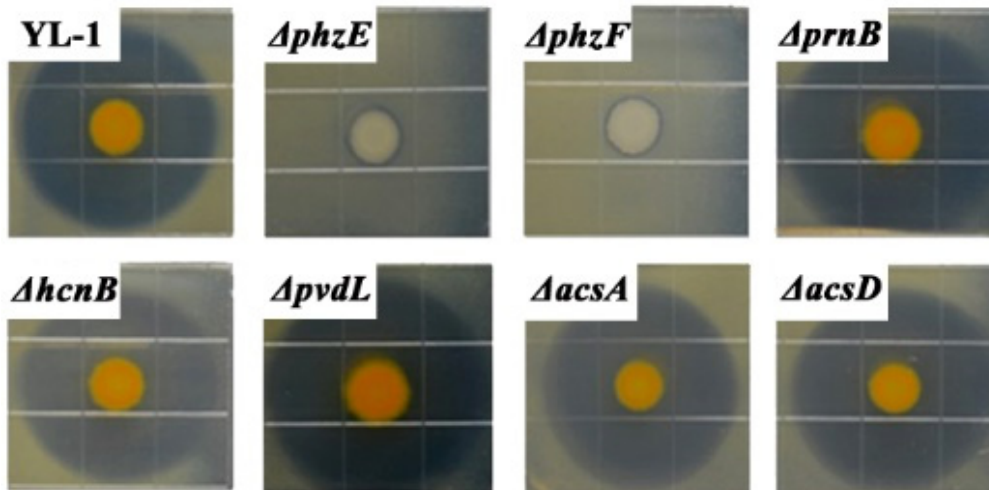

**Figure S5.** Anti-*Xoo* activity of *P. chlororaphis* YL-1 and its seven mutants on LB plates. All strains precultured in liquid LB medium at 28°C and 200 rpm for 24 h were resuspended in distilled liquid LB medium to the desired cell density of  $10^8$  CFU/mL. After spraying the suspension of *Xoo* ( $10^8$  CFU/mL) onto the surface of LB plates for 1 s, 5 µL cells of strain YL-1 or mutants was

injected into the central hole (5 mm) of LB plates and incubated at 28°C for 48 h. Distilled LB medium was used as a control. The inhibitory zone diameters of strain YL-1 and mutants were measured when *Xoo* covered the entire control plates. Each treatment was replicated three times, and each experiment was repeated thrice independently.

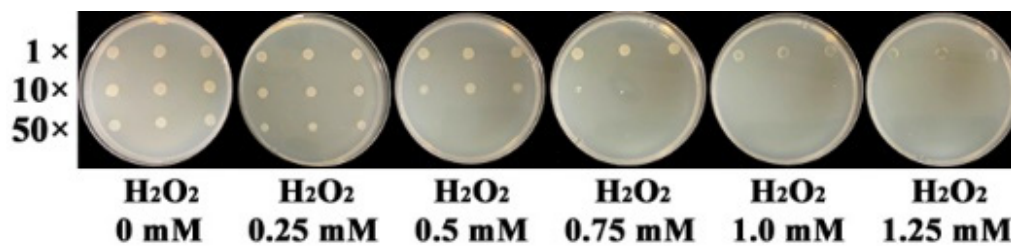

**Figure S6.** H<sub>2</sub>O<sub>2</sub> sensitivity of *A. citrulli* on LB plates. The one-, ten-, fiftyfold dilutions (1×, 10×, and 50×) of the bacterial suspension were spotted on to LB plates, which contained different concentrations of H<sub>2</sub>O<sub>2</sub> at 0, 0.25, 0.5, 0.75, 1.0, and 1.25 mM. Each treatment was replicated three times, and each experiment was repeated thrice independently.

**Table S1.** Strains, plasmids and primers used in this study

| Items                                  | Relevant characteristics*                                             | Source          |
|----------------------------------------|-----------------------------------------------------------------------|-----------------|
| <b><i>Pseudomonas chlororaphis</i></b> |                                                                       |                 |
| YL-1                                   | Wild-type strain, Amp <sup>r</sup>                                    | Liu (2015) [24] |
| $\Delta pvdL$                          | <i>pvdL</i> in-frame deletion mutant of strain YL-1, Amp <sup>r</sup> | Liu (2021) [33] |
| $\Delta phzE$                          | <i>phzE</i> in-frame deletion mutant of strain YL-1, Amp <sup>r</sup> | This study      |
| $\Delta phzF$                          | <i>phzF</i> in-frame deletion mutant of strain YL-1, Amp <sup>r</sup> | This study      |
| $\Delta prnB$                          | <i>prnB</i> in-frame deletion mutant of strain YL-1, Amp <sup>r</sup> | This study      |
| $\Delta hcnB$                          | <i>hcnB</i> in-frame deletion mutant of strain YL-1, Amp <sup>r</sup> | This study      |
| $\Delta acsA$                          | <i>acsA</i> in-frame deletion mutant of strain YL-1, Amp <sup>r</sup> | This study      |
| $\Delta acsD$                          | <i>acsD</i> in-frame deletion mutant of strain YL-1, Amp <sup>r</sup> | This study      |
| <b><i>Escherichia coli</i></b>         |                                                                       |                 |

|                                                            |                                                                                                                                                 |                         |
|------------------------------------------------------------|-------------------------------------------------------------------------------------------------------------------------------------------------|-------------------------|
| DH5α                                                       | F, φ80lacZΔM15, Δ (lacZYA-argF) U169, deoR, recA1, endA1, hsdR17 (r <sub>s</sub> ,m <sub>s</sub> <sup>+</sup> ), phoA, supE44, λ, thi-1, gyrA96 | Sangon Corp. collection |
| S17-λpir                                                   | (F')RP4-2-Tc::Mu aphA::Tn7 recA λpir lysogen, Sm <sup>r</sup> , Tp <sup>r</sup>                                                                 | Simon(1983) [29]        |
| <b>Phytopathogenic bacteria</b>                            |                                                                                                                                                 |                         |
| <i>Acidovorax citrulli</i> strain XJX12                    | Wild-type strain                                                                                                                                | Liu (2019) [37]         |
| <i>Xanthomonas oryzae</i> pv. <i>oryzae</i> strain PXO99   | Wild-type strain                                                                                                                                | Liu (2021) [33]         |
| <i>Xanthomonas oryzae</i> pv. <i>oryzicola</i> strain RS11 | Wild-type strain                                                                                                                                | Liu (2021) [33]         |
| <b>Plasmids</b>                                            |                                                                                                                                                 |                         |
| pEX18Gm                                                    | Suicide plasmid with a <i>sacB</i> gene, Gm <sup>r</sup>                                                                                        | Hoang (1998) [28]       |
| pEX18- <i>pvdL</i>                                         | pEX18GM with two flanking fragments of <i>pvdL</i>                                                                                              | Liu (2021) [33]         |
| pEX18- <i>phzE</i>                                         | pEX18GM with two flanking fragments of <i>phzE</i>                                                                                              | This study              |
| pEX18- <i>phzF</i>                                         | pEX18GM with two flanking fragments of <i>phzF</i>                                                                                              | This study              |
| pEX18- <i>prnB</i>                                         | pEX18GM with two flanking fragments of <i>prnB</i>                                                                                              | This study              |
| pEX18- <i>hcnB</i>                                         | pEX18GM with two flanking fragments of <i>hcnB</i>                                                                                              | This study              |
| pEX18- <i>acsA</i>                                         | pEX18GM with two flanking fragments of <i>acsA</i>                                                                                              | This study              |
| pEX18- <i>acsD</i>                                         | pEX18GM with two flanking fragments of <i>acsD</i>                                                                                              | This study              |
| <b>Primers**</b>                                           |                                                                                                                                                 |                         |
| <i>pvdL</i> -F1                                            | 5'-CGG <u>GAATTC</u> GGAAGAAAATCGGCACCACG (EcoRI) -3'                                                                                           | Liu (2021) [33]         |
| <i>pvdL</i> -R1                                            | 5'-CGG <u>GGTACC</u> GAGGAACTGGCGCAGTACAT (KpnI) -3'                                                                                            | Liu (2021) [33]         |
| <i>pvdL</i> -F2                                            | 5'-CGG <u>GGTACC</u> CTCTGATCCTGCTCTTCGGC (KpnI) -3'                                                                                            | Liu (2021) [33]         |
| <i>pvdL</i> -R2                                            | 5'-GCT <u>CTAGA</u> GCCTGCTTGCATAGTGGTC (XbaI) -3'                                                                                              | Liu (2021) [33]         |
| <i>phzE</i> -F1                                            | 5'-CGG <u>GGTACC</u> TGACCCCCAAGCCCAGTGAC (KpnI) -3'                                                                                            | This study              |
| <i>phzE</i> -R1                                            | 5'-CCC <u>AAGCTT</u> TACAACAGGGCAAACGGCTC (HindIII) -3'                                                                                         | This study              |
| <i>phzE</i> -F2                                            | 5'-CCC <u>AAGCTT</u> TTTCTACAACACCTTCGCCG (HindIII) -3'                                                                                         | This study              |
| <i>phzE</i> -R2                                            | 5'-CCG <u>GAATTC</u> TCATCGGCGTCAAAGAACAC (EcoRI) -3'                                                                                           | This study              |
| <i>phzF</i> -F1                                            | 5'-CGG <u>GGTACC</u> TCCAACAGCCGAAAATCAAC (KpnI) -3'                                                                                            | This study              |

|                |                                                          |            |
|----------------|----------------------------------------------------------|------------|
| <i>phzF-R1</i> | 5'-CCC <u>AAGCTT</u> TCATCGGCGTCAAAGAACAC (HindIII) -3'  | This study |
| <i>phzF-F2</i> | 5'-CCC <u>AAGCTT</u> TCAGGGCGTGGAATCGGCC (HindIII) -3'   | This study |
| <i>phzF-R2</i> | 5'-CCG <u>GAATTC</u> ATCTGCTGGCTGGTTTCGCG (EcoRI) -3'    | This study |
| <i>prnB-F1</i> | 5'-GG <u>GGTACC</u> GACGCATTCAACGCCGAGAT (KpnI) -3'      | This study |
| <i>prnB-R1</i> | 5'-CG <u>GGATCC</u> CACCCGGTCCAAGGTGCGTT (BamHI) -3'     | This study |
| <i>prnB-F2</i> | 5'-CG <u>GGATCC</u> CCGTGCTCGACGAATCCTGA (BamHI) -3'     | This study |
| <i>prnB-R2</i> | 5'-GCT <u>CTAGA</u> AACTCCTTCGGGTCGTGCTC (XbaI) -3'      | This study |
| <i>hcnB-F1</i> | 5'-GG <u>GGTACC</u> TGTTTTCCAGTTAGGGCAGG (KpnI) -3'      | This study |
| <i>hcnB-R1</i> | 5'-CCC <u>AAGCTT</u> ATCAGTGGATTAGGCTCAT (HindIII) -3'   | This study |
| <i>hcnB-F2</i> | 5'-CCC <u>AAGCTT</u> GATTCCCTTTCCGCTTTC (HindIII) -3'    | This study |
| <i>hcnB-R2</i> | 5'-CG <u>GAATTC</u> CGGTCCTCGTCGTCGTAGAT (EcoRI) -3'     | This study |
| <i>acsA-F1</i> | 5'-GG <u>GGTACC</u> TCTTTGCTGGTGAGTTTGAT (KpnI) -3'      | This study |
| <i>acsA-R1</i> | 5'-CCC <u>AAGCTT</u> GCAAGGGCGAAGTGGTCAAC (HindIII) -3'  | This study |
| <i>acsA-F2</i> | 5'-CCC <u>AAGCTT</u> AAAGAAAGTCTTCGGCCAGCA (HindIII) -3' | This study |
| <i>acsA-R2</i> | 5'-CG <u>GAATTC</u> GACCTCAACCCCAAGACCCT (EcoRI) -3'     | This study |
| <i>acsD-F1</i> | 5'-GG <u>GGTACC</u> ACACATAGGGCTTGCGGGTC (KpnI) -3'      | This study |
| <i>acsD-R1</i> | 5'-CCC <u>AAGCTT</u> CGTTATGGCTGAGTTGTCCC (HindIII) -3'  | This study |
| <i>acsD-F2</i> | 5'-CCC <u>AAGCTT</u> ATCTTCGATAAAACATGCTT (HindIII) -3'  | This study |
| <i>acsD-R2</i> | 5'-CG <u>GAATTC</u> TGGCTCCAGCAGCACCATGCT (EcoRI) -3'    | This study |
| PhzE FP        | 5'- CAG <u>GAATTC</u> TGCTCAAGGACTTCTGGGGC(EcoRI) -3'    | This study |
| PhzE RP        | 5'- CAC <u>AAGCTT</u> CAGCTCAAAGGCGATGGTG(C HindIII) -3' | This study |
| RT-oxyR-F      | 5'-CGTCGCTCGAAACCATCAAGCAC-3'                            | This study |
| RT-oxyR-R      | 5'-CTGCCGTCGTCCTCCTCGAT-3'                               | This study |
| RT-soxR-F      | 5'-AACTCGACGAACGCATCGCCAC-3'                             | This study |

|                    |                               |                 |
|--------------------|-------------------------------|-----------------|
| RT- <i>soxR</i> -R | 5'-CAACGAGAGACAGCCGCAACCG -3' | This study      |
| RT- <i>katB</i> -F | 5'-GATGGTCCTGAACAAGAACG-3'    | This study      |
| RT- <i>katB</i> -R | 5'-TCCGAATACGAGAACACGCG-3'    | This study      |
| RT- <i>katE</i> -F | 5'-TGGATGAAGAACACGGGGAT-3'    | This study      |
| RT- <i>katE</i> -R | 5'-TGTTCTGCCGCTTCTCCACG-3'    | This study      |
| RT- <i>katG</i> -F | 5'-AGGTGCCGAAGGAAGAACTG-3'    | This study      |
| RT- <i>katG</i> -R | 5'-AGTTGCTCGGGCTGGTTGAC-3'    | This study      |
| RT- <i>ahpC</i> -F | 5'-GTAGTTGTCGGCGGCGTCTT-3'    | This study      |
| RT- <i>ahpC</i> -R | 5'-CAAGTGGTCCGTGCTGATCT-3'    | This study      |
| RT- <i>ahpF</i> -F | 5'-ATCCTCAATCCCCGCATCCG-3'    | This study      |
| RT- <i>ahpF</i> -R | 5'-GCCGTTGAGGAAGACCATGG-3'    | This study      |
| RT- <i>trxA</i> -F | 5'-TACTGGTGGACTACTGGGCC-3'    | This study      |
| RT- <i>trxA</i> -R | 5'-TGAGCTTGCCCTGGTAGGAG-3'    | This study      |
| RT- <i>sodA</i> -F | 5'-GTCAACAATCTGAACGCCGC-3'    | This study      |
| RT- <i>sodA</i> -R | 5'-AACGCATCGAAACCGCCCAG-3'    | This study      |
| RT- <i>sodB</i> -F | 5'-CCGCACTACAGCCAGGAAAC-3'    | This study      |
| RT- <i>sodB</i> -R | 5'-TGGGCGGCGTTGTTGTAGAT-3'    | This study      |
| RT- <i>sodC</i> -F | 5'-GCTTCCACATCCACGCCAAT-3'    | This study      |
| RT- <i>sodC</i> -R | 5'-TGATGTTGGGCAGTTCGCCG-3'    | This study      |
| <i>XJ-RT</i> -F    | 5'-AGCCATTTCCCCGTCCAGAC-3'    | Liu (2019) [37] |
| <i>XJ-RT</i> --R   | 5'-CGGGGCTCGAAGCTCCCGTAG-3'   | Liu (2019) [37] |

\*Amp<sup>R</sup>, Gm<sup>R</sup>, resistance to ampicillin and gentamicin, respectively.

\*\* Restriction enzyme digestion sites are in bold.
